# Supplementary material for: Safety of Complementary and Alternative Medicine (CAM) treatment among children and young adults who suffer from adverse effects of conventional cancer treatment: A systematic review
Source: PubMed Central journal article supplement — Integr Cancer Ther. 2022 Jun 21;21:15347354221105563. doi: 10.1177/15347354221105563 (PMC9218455; doi:10.1177/15347354221105563), 2022-06-21
Supplement: sj-pdf-1-ict-10.1177_15347354221105563.pdf [file sj-pdf-1-ict-10.1177_15347354221105563.pdf]

## 1. Search strategy

Search Methods: Various combinations of controlled vocabulary/thesaurus terms (MESH) and text words, adjusted for each database, were used. The following controlled terms were used:

Medline(pubmed) and AMED

Exp neoplasms, exp complementary therapies, exp integrative medicine, exp child, exp adolescent, exp young adult, exp infant, adverse effects.sf(subheading, fs), drug related side effects and adverse reations, exp adeverse drug reation reporting systems, cross-sectional studies, cohort studies, qualitative research, exp interview, exp observational study.

Embase

Exp neoplasms, exp complemetary therapies, exp integrative medicine, exp child exp adolescent, exp young adult/, exp infant/, exp adverse event side effects fs., side effects fs., exp "drug-related side effects and adverse reactions"/, exp adverse drug reaction reporting systems/, cross-sectional studies, cohort studies, qualitative research, exp interview, exp observational study.

Cinahl

Exp neoplasms, exp alternative therapies, exp child, exp adolescence, exp adverse drug event, exp nonexperimental studies, exp qualitative studies.

PsycInfo

Exp neoplams , exp "side effects (drugs)", cohort studies qualittive research.

Cochrane Library

In cochrane library we will use for the following key words:

Neoplasm or cancer, pediatric oncology, cancer and palliative, integrative oncology, childhood cancer, CAM, complementary medicine, therapy, alternative medicine or therapy, CAM and modalities or treatment, unconventional or unproven medicine, homopath, acupunture, faith healing or herbs or massage, or nutrition, or vitamins, ofr chiroprach, child pediatric, juvenile or teen,or tooddler, young dhild young person infant or adolescent. Side effect or adverse effect, safety and harm, risk or adverse drug reaction, or symptom or symptom management.

These text words were used:

Neoplasm, leukemia, Lymphoma/soft tissue sarcoma, Pediatric cancer, pediatric oncology, integrative oncology, cancer treatment, childhood cancer, pediatric, palliative care, CAM modalities, CAM treatment, CAM, integrative medicine, complementary medicine, alternative medicine, unconventional medicine, spiritual healing/faith healing, children, child\*, infant, adolescent, juvenile, pediatric, puberty, young adults, young person, teen\*, childhood, toddler, side effects, safety, risks factors, harm, adverse reactions, indirect/direct risks, adverse drug reaction, symptom management, hopelessness, suffering

The searches will be combined with AND and OR
